# Supplementary figures and images for: The carcinine transporter CarT is required in Drosophila photoreceptor neurons to sustain histamine recycling
Source: eLife journal article supplement (doi:10.7554/elife.10972), 2015-12-14

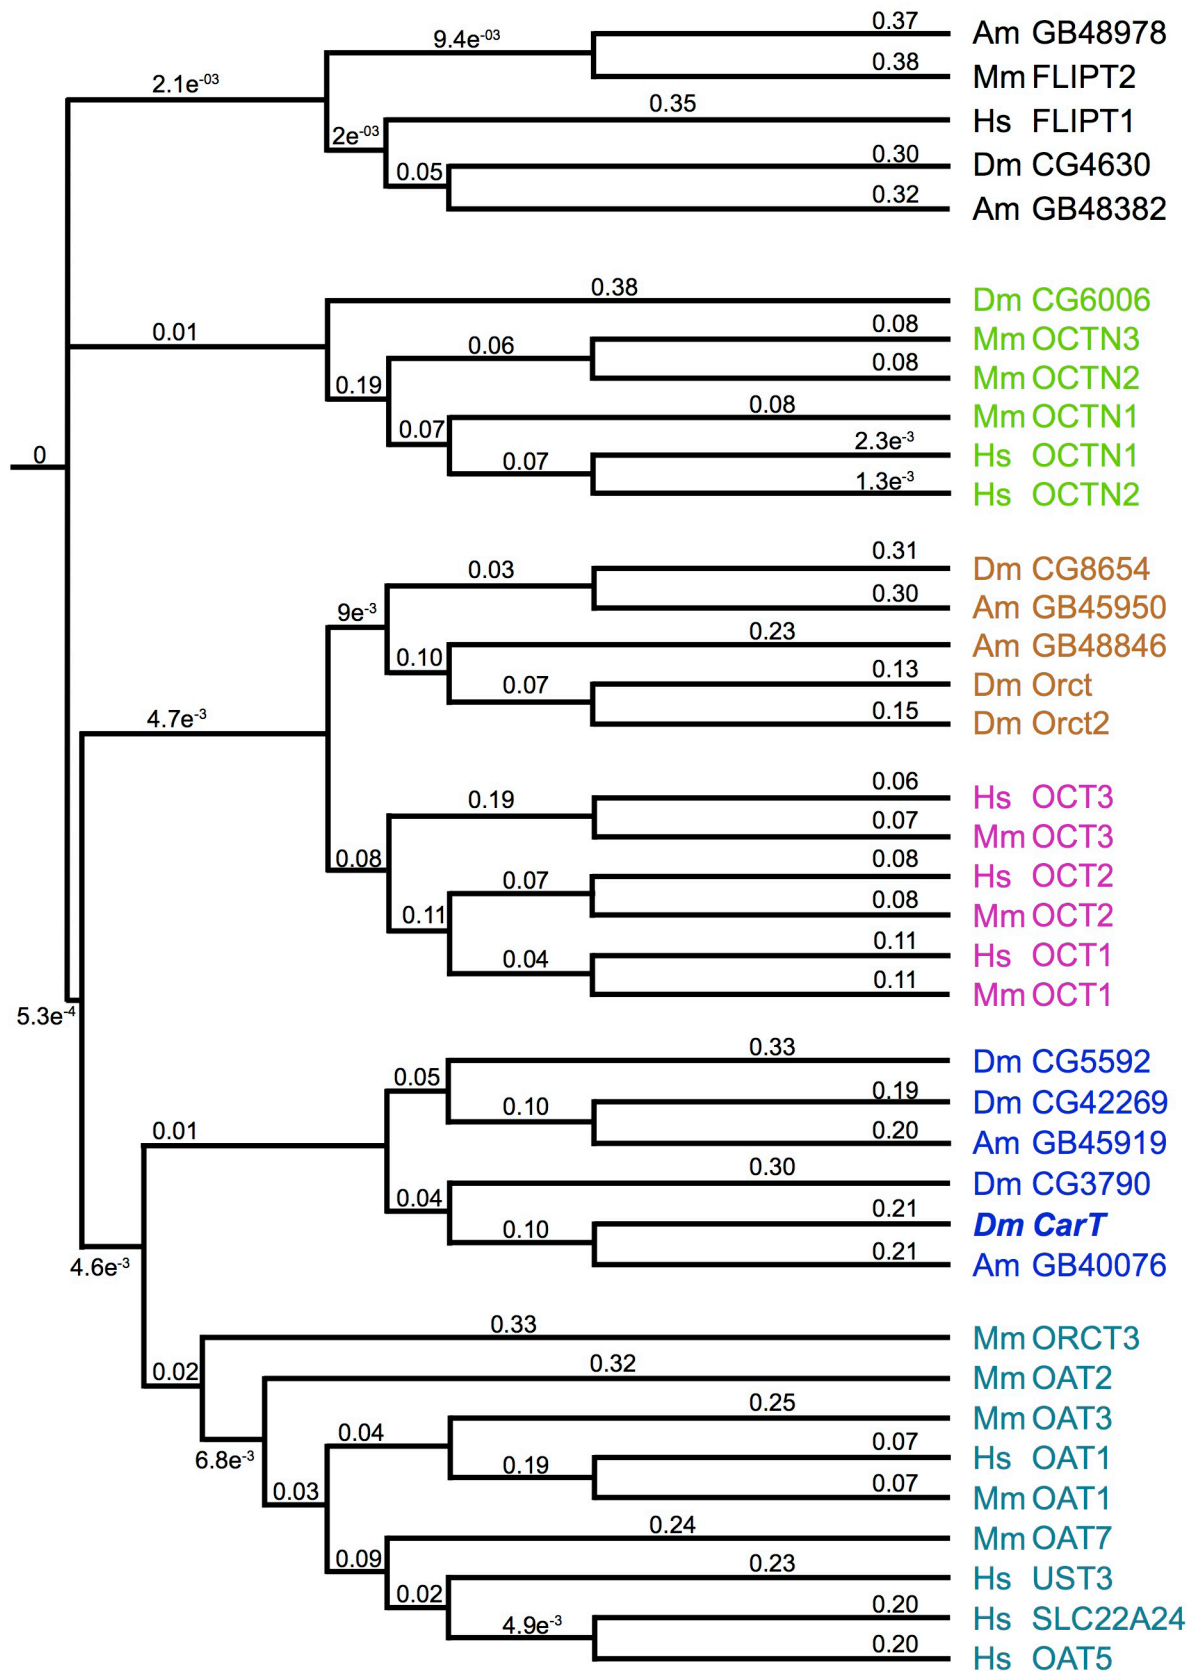

Supplement: supp [file elife-10972-supp-v1.zip]

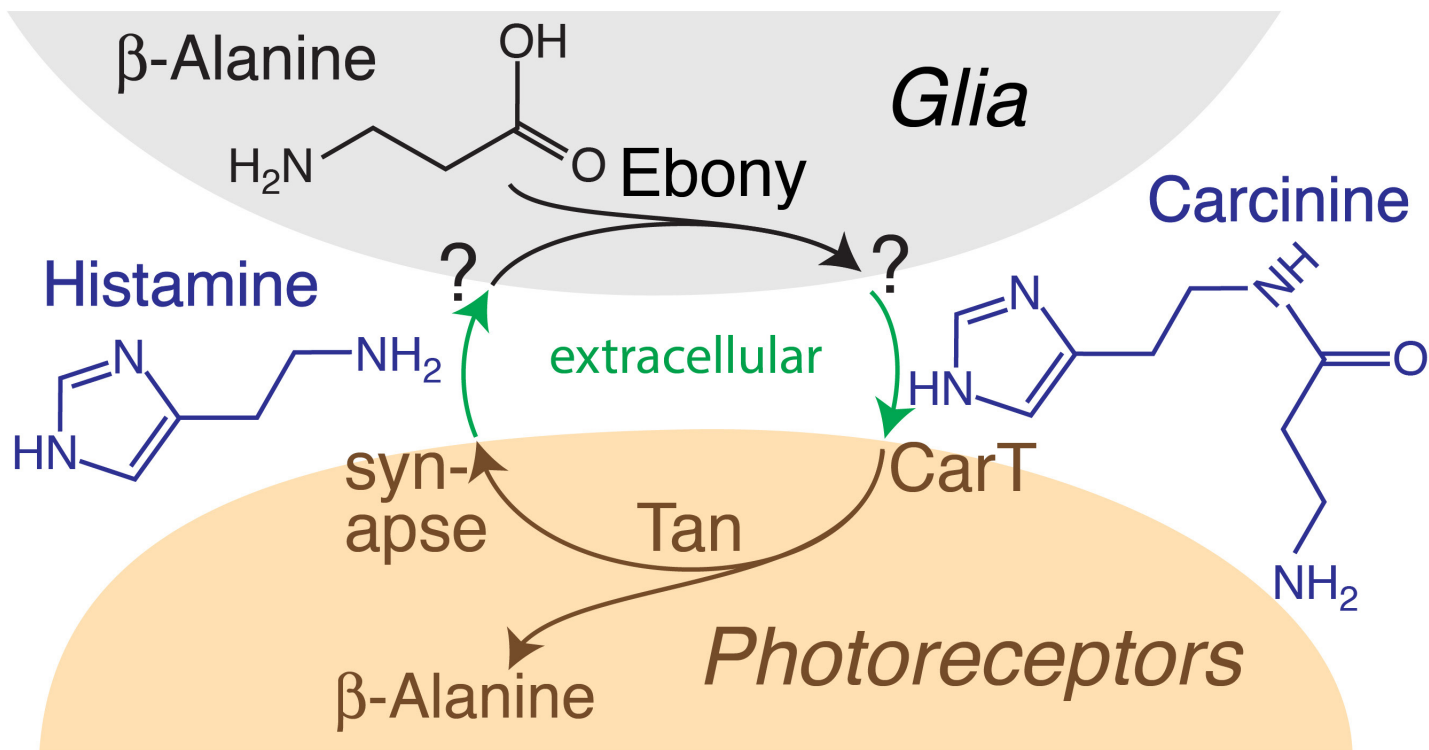

Supplement: supp [file elife-10972-supp-v1.zip]
